# Supplementary material for: Exploring the synergetic effects of the major components of biomass additives in the pyrolysis of polylactic acid
Source: Royal Society of Chemistry journal article supplement (doi:10.1039/d1gc03002g), 2021-01-01
Supplement: d1gc03002g1.pdf [file d1gc03002g1.pdf]

## Exploring the synergetic effects of the major components of biomass additives in the pyrolysis of polylactic acid

Ce Sun<sup>1</sup>, Xiaojian Chen<sup>1</sup>, Dingyuan Zheng<sup>1</sup>, Wenrui Yao<sup>1</sup>, Haiyan Tan<sup>1</sup>, Yanhua Zhang<sup>\*1</sup>, Song Liu<sup>\*2</sup>

<sup>1</sup>Key Laboratory of Bio-based Material Science & Technology, Northeast Forestry University, Ministry of Education, Harbin 150040, China

<sup>2</sup>College of Chemistry, Chemical Engineering and Resource Utilization, Northeast Forestry University, Harbin 150040, China

\* Co-corresponding author: **Yanhua Zhang**: zhangyanhua@nefu.edu.cn;

**Song Liu**: carlosliusong@nefu.edu.cn

### S1. Materials and methods

#### S1.1 Raman spectrometer

The molecular structure of the pyrolysis char was determined by a DXR2xi Raman microscopic imaging spectrometer (Thermo Fisher Scientific Co., Ltd) with 532 nm excitation wavelength at 6.8 mW power at 120 Hz. The spectrum range was from 500-4000 cm<sup>-1</sup> with 900 scans per sample.

#### S1.2 X-ray photoelectron spectroscopy (XPS)

The element of the pyrolysis char was investigated by (Thermo Fisher Scientific Co., Ltd). Monochromatic Al K $\alpha$  radiation (1486.6 eV) with resolution of Ag 3d 0.8 eV was used to make analysis.

#### S1.3 Pyrolysis experiments

A sample of 1g was added to the quartz tube of the pyrolysis furnace, and the temperature was raised from room temperature to 500°C at a heating rate of 10°C/min. The volatile substances generated by the reaction were passed into the formaldehyde collection tube for condensation and collection

#### S1.4 Kinetic analysis

**Table S1. Differential and integral equations for different solid-state reaction mechanisms during decomposition processes.**

| Symbol | Reaction mechanisms | $f(\alpha) = (1/k)(d\alpha/dt)$ | $g(\alpha) = kt$ |
|--------|---------------------|---------------------------------|------------------|
|--------|---------------------|---------------------------------|------------------|

---

|             |                                           |                                      |                                        |
|-------------|-------------------------------------------|--------------------------------------|----------------------------------------|
| Reaction    |                                           |                                      |                                        |
| order       |                                           |                                      |                                        |
| F1          | First-order                               | $1 - \alpha$                         | $-\ln(1 - \alpha)$                     |
| F1.5        | 1.5th-order                               | $(1 - \alpha)^{3/2}$                 | $2[(1 - \alpha)^{-1/2} - 1]$           |
| F2          | Second-order                              | $(1 - \alpha)^2$                     | $2(1 - \alpha)^{-1} - 1$               |
| F3          | Third-order                               | $(1 - \alpha)^3$                     | $[(1 - \alpha)^{-2} - 1]/2$            |
| F4          | Fourth-order                              | $(1 - \alpha)^4$                     | $[(1 - \alpha)^{-3} - 1]/3$            |
| A2          | Avrami-Erofeev                            | $2(1 - \alpha)[- \ln(1 - \alpha)]^1$ | $[- \ln(1 - \alpha)]^{1/2}$            |
| A3          | Avrami-Erofeev                            | $3(1 - \alpha)[- \ln(1 - \alpha)]^2$ | $[- \ln(1 - \alpha)]^{1/3}$            |
| A4          | Avrami-Erofeev                            | $4(1 - \alpha)[- \ln(1 - \alpha)]^3$ | $[- \ln(1 - \alpha)]^{1/4}$            |
| Contracting |                                           |                                      |                                        |
| geometry    |                                           |                                      |                                        |
| R2          | Contracting<br>cylinder                   | $2(1 - \alpha)^{1/2}$                | $1 - (1 - \alpha)^{1/2}$               |
| R3          | Contracting<br>sphere                     | $3(1 - \alpha)^{3/2}$                | $1 - (1 - \alpha)^{1/3}$               |
| Diffusional |                                           |                                      |                                        |
| D1          | One-dimensional<br>diffusion              | $1/2\alpha$                          | $\alpha^2$                             |
| D2          | Two-dimensional<br>diffusion<br>(Valensi) | $[- \ln(1 - \alpha)]^{-1}$           | $(1 - \alpha)\ln(1 - \alpha) + \alpha$ |

---

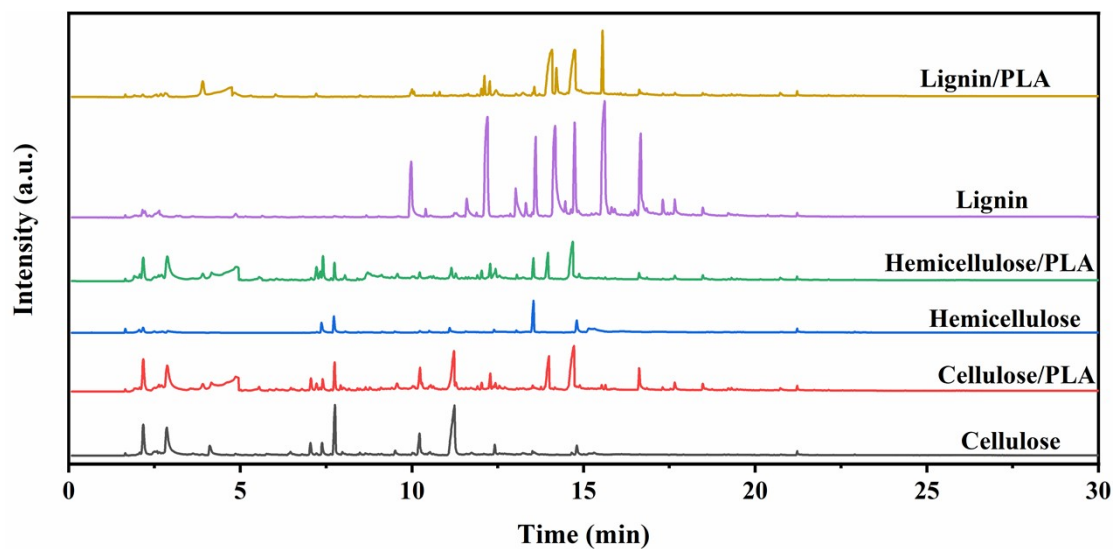

**Fig. S1** The Ion map of pyrolysis products using Py-GC/MS

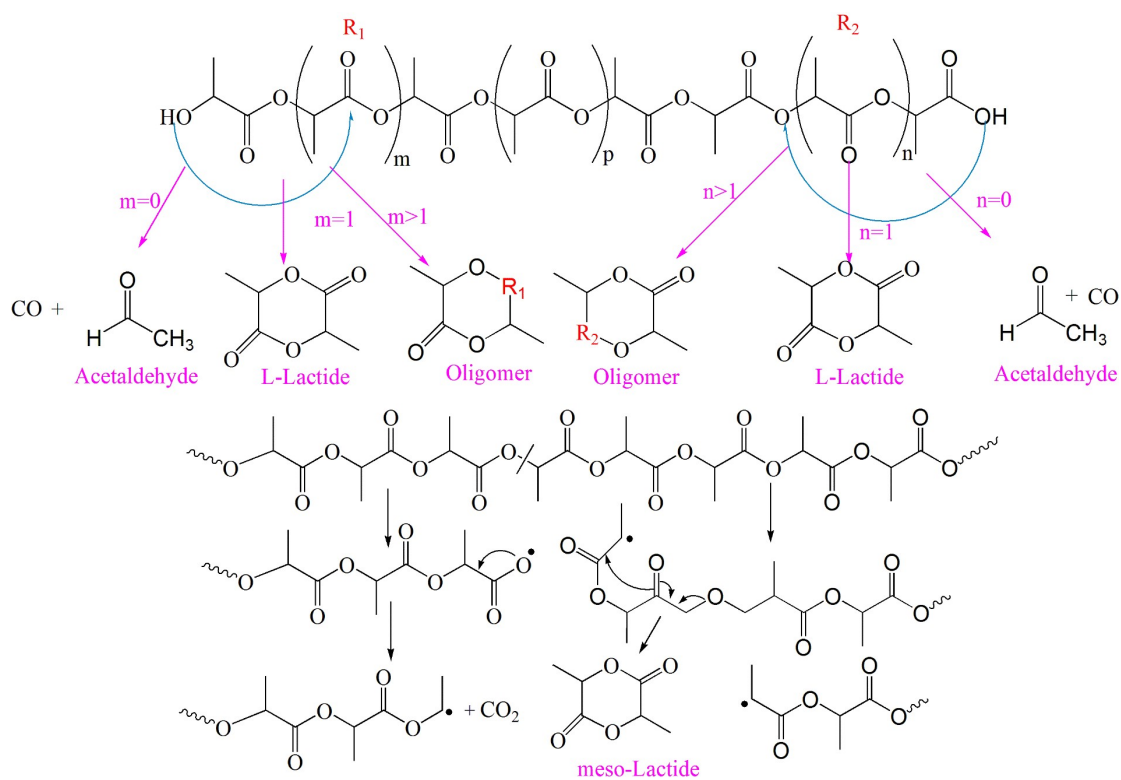

**Fig. S2** Decomposition mechanism diagram of poly(lactide).

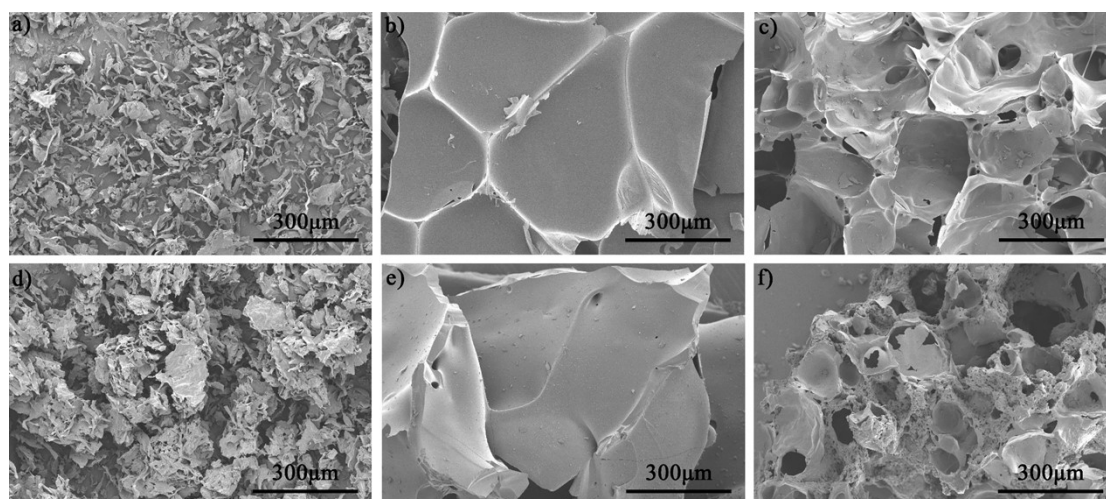

**Fig. S3** The SEM of biochar (a) cellulose, (b) hemicellulose, (c) lignin, (d) cellulose/PLA, (e) hemicellulose/PLA, (f) lignin/PLA after pyrolysis

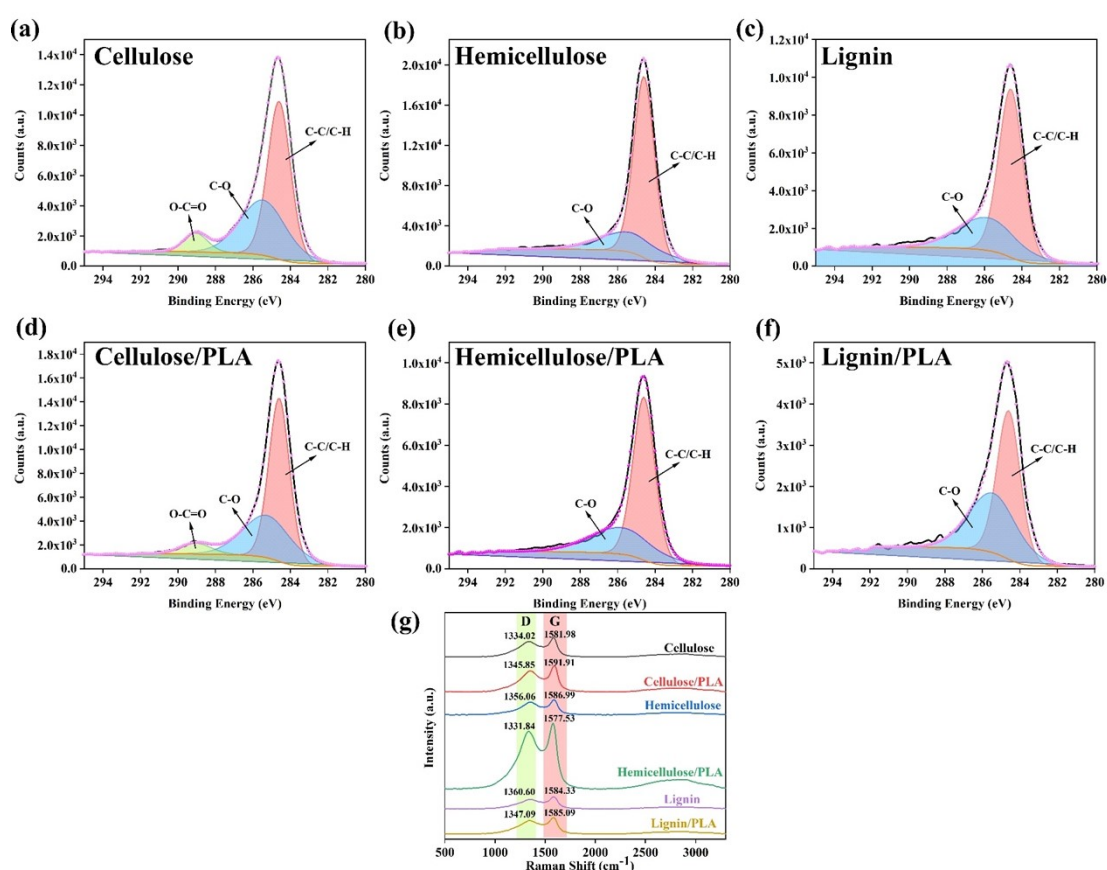

**Fig. S4** The XPS analysis of (a) cellulose, (b) hemicellulose, (c) lignin, (d) cellulose/PLA, (e) hemicellulose/PLA, (f) lignin/PLA biochar after co-pyrolysis, (g) Raman spectrometer of biochar after co-pyrolysis

**Table S2 Parameters for biochar after co-pyrolysis by XPS and Roman using peak area**

|                   | $I_D/I_G$ | C     | O     | C-C   | C-O   | C=O  |
|-------------------|-----------|-------|-------|-------|-------|------|
| Cellulose         | 2.82      | 86.09 | 13.91 | 54.90 | 38.44 | 6.65 |
| cellulose/PLA     | 2.72      | 90.01 | 9.99  | 58.65 | 35.55 | 5.80 |
| Hemicellulose     | 2.56      | 94.85 | 5.15  | 75.45 | 24.55 | -    |
| hemicellulose/PLA | 2.84      | 90.5  | 9.50  | 67.83 | 32.17 | -    |
| Lignin            | 2.86      | 93.86 | 6.14  | 67.52 | 32.48 | -    |
| lignin/PLA        | 3.06      | 91.18 | 8.82  | 54.65 | 45.35 | -    |

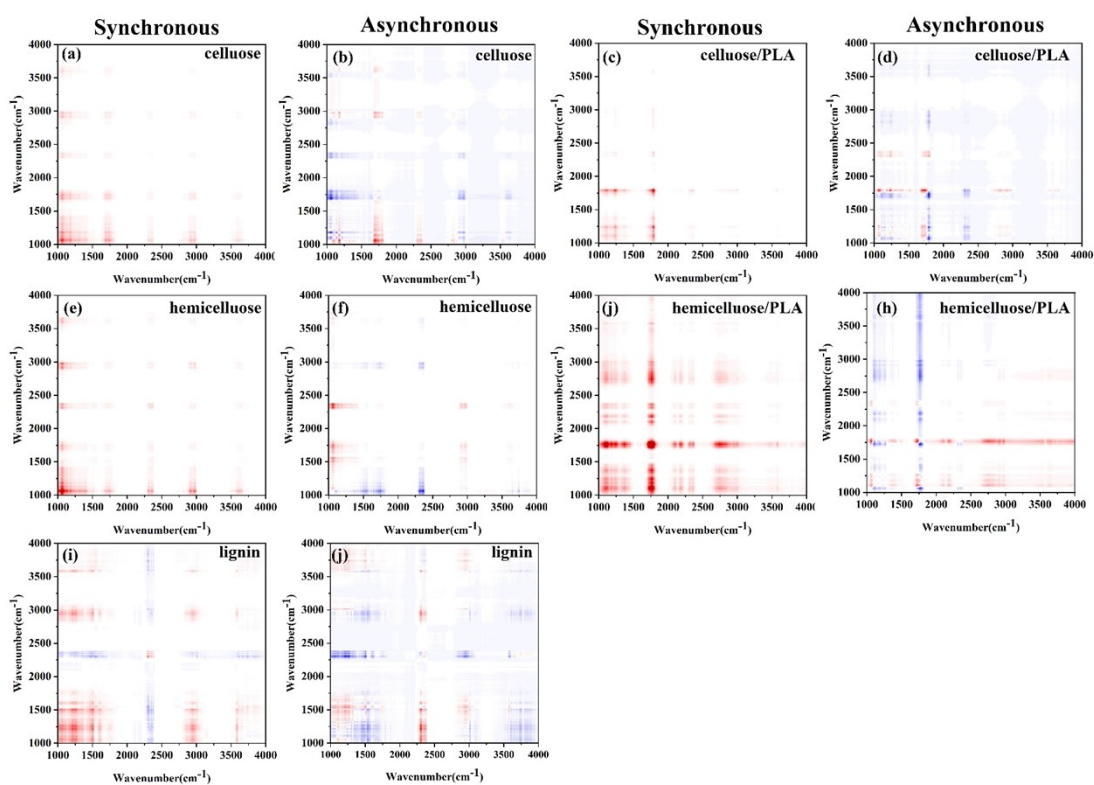

**Fig. S5 The synchronous map of (a) cellulose, (c) cellulose/PLA, (e) hemicellulose, (g) hemicellulose/PLA (i) lignin; and the asynchronous map of (b) cellulose, (d) cellulose/PLA, (f) hemicellulose, (h) hemicellulose/PLA (j) lignin.**

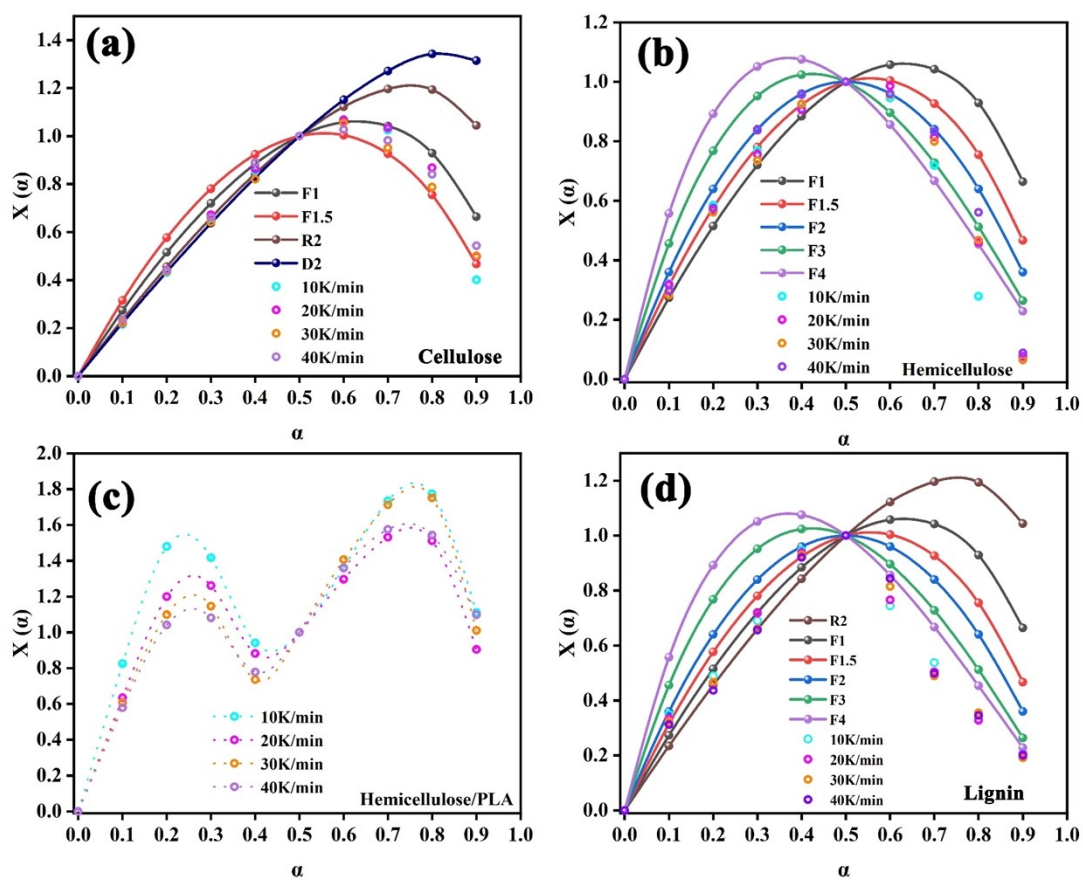

**Fig. S6** The fitting curves of Criado method. (a) cellulose, (b) hemicellulose, (c) lignin, (d) hemicellulose/PLA
